# Supplementary material
Source: bioRxiv or medRxiv preprint supplement (https://www.biorxiv.org/content/biorxiv/early/2019/09/08/760637/DC1/embed/media-1.pdf)
Supplement: Supplementary file [file media-1.pdf]

**Authors: Itzel Gaytán<sup>1†</sup>, Ayixon Sánchez-Reyes<sup>1†</sup>, Manuel Burelo<sup>2</sup>,  
Martín Vargas-Suárez<sup>1</sup>, Ivan Liachko<sup>3</sup>, Maximilian Press<sup>3</sup>, Shawn  
Sullivan<sup>3</sup>, Javier Cruz-Gómez<sup>4</sup> and Herminia Loza-Tavera<sup>1\*</sup>**

**Title: Degradation of recalcitrant polyurethane and xenobiotic  
additives by a selected landfill microbial community and its  
biodegradative potential revealed by proximity ligation-based  
metagenomic analysis**

**Supporting information:**

**Number of pages 9**

**Number of tables 4**

**Number of figures 4**

**Table S1. Effects of BP8 biodegradative activity on the PE-PU-A copolymer analyzed by Differential Scanning Calorimetry.**

| <b>Culture time (days)</b> | <b>Tg (°C)</b> | <b>Tm-I (°C)</b> | <b>Tm-II (°C)</b> | <b>Tm-III (°C)</b> | <b>Tc (°C)</b> |
|----------------------------|----------------|------------------|-------------------|--------------------|----------------|
| Non-inoculated             | 50.2           | 70.0             | 210.6             | 398.1              | 459.6          |
| 5                          | 39.5           | 68.8             | 211.0             | 408.7              | 478.2          |
| 10                         | 46.0           | 68.0             | 210.1             | 407.9              | 480.2          |
| 15                         | 38.1           | 70.5             | 211.1             | 393.2              | 479.9          |
| 20                         | 46.2           | 78.8             | 213.9             | 392.5              | 476.2          |

Tg = glass transition temperature; Tm = melting temperature; Tc = crystallization temperature.

**Table S2. Molecular weight and polydispersity index of the PE-PU-A copolymer during cultivation with the BP8 community.**

| <b>Culture time (days)</b> | <b>Tg (°C)</b> | <b>Tm-I (°C)</b> | <b>Tm-II (°C)</b> | <b>Tm-III (°C)</b> | <b>Tc (°C)</b> |
|----------------------------|----------------|------------------|-------------------|--------------------|----------------|
| Non-inoculated             | 50.2           | 70.0             | 210.6             | 398.1              | 459.6          |
| 5                          | 39.5           | 68.8             | 211.0             | 408.7              | 478.2          |
| 10                         | 46.0           | 68.0             | 210.1             | 407.9              | 480.2          |
| 15                         | 38.1           | 70.5             | 211.1             | 393.2              | 479.9          |
| 20                         | 46.2           | 78.8             | 213.9             | 392.5              | 476.2          |

Tg = glass transition temperature; Tm = melting temperature; Tc = crystallization temperature.

**Table S3. General features of the deconvoluted genomes from the BP8 metagenome.**

| Cluster ID | Genome Size (bp) | Num Contigs | Contig N50 | <sup>a</sup> Completeness (%) | <sup>b</sup> Relative Abundance (%) | Novelty Score (%) | GC (%) | Identification                                 | Genes assigned | Proteins assigned |
|------------|------------------|-------------|------------|-------------------------------|-------------------------------------|-------------------|--------|------------------------------------------------|----------------|-------------------|
| 1          | 4 275 656        | 282         | 51 004     | 89.4                          | 57.7                                | 1.6               | 67.8   | <i>Paracoccus</i> sp. BP8                      | 4 225          | 4 073             |
| 2          | 2 157 639        | 388         | 7 081      | 95.6                          | 3.7                                 | 98.7              | 47.3   | <i>Chryseobacterium</i> sp. BP8.2              | 2 253          | 2 185             |
| 3          | 5 478 545        | 1098        | 6 493      | 95.5                          | 12.5                                | 99.2              | 48.1   | <i>Parapedobacter</i> sp. BP8.3                | 5 310          | 5 173             |
| 4          | 2 790 120        | 158         | 39 967     | 97.7                          | 3.6                                 | 94.0              | 71.3   | <sup>c</sup> Microbacteriaceae bacterium BP8.4 | 2 850          | 2 705             |
| 5          | 2 916 513        | 1146        | 2 823      | 71.0                          | 22.5                                | 2.5               | 58.4   | <i>Ochrobactrum intermedium</i> BP8.5          | 3 472          | 3 162             |

<sup>a</sup>Completeness was calculated based on 40 single copy gene markers [36]. All the genomes' drafts have at least 18 tRNAs and, except for cluster 5, at least 1 rDNA gene copy.

<sup>b</sup>Relative abundance was normalized according to the reads distribution along the deconvoluted taxon.

<sup>c</sup>For Microbacteriaceae bacterium BP8.4 no further classification was possible even that nine single-copy markers were analyzed.

**Table S4. <sup>a</sup>Phylogenetic relatedness of the bacterial species from the BP8 community identified by Hi-C metagenome deconvolution**

| Clusters/<br>Clasification/<br>GeneBank Acc.<br>Num.                             | Organism                                    | Assembly        | Genome<br>size<br>(Mb) | GC<br>content<br>(%) | <sup>a</sup> ANI<br>value<br>(%) | Proteins<br>encoded<br>in the<br>genomes |
|----------------------------------------------------------------------------------|---------------------------------------------|-----------------|------------------------|----------------------|----------------------------------|------------------------------------------|
| Cluster 1/<br><i>Paracoccus</i> sp.<br>BP8<br>GCA_003852815.1                    | <i>Paracoccus</i> sp. J39                   | GCA_000518925.1 | 4.42837                | 68.08                | 98.73                            | 4131-4993                                |
|                                                                                  | <i>Paracoccus denitrificans</i>             | GCA_000203895.1 | 5.23619                | 66.78                | 90.24                            |                                          |
|                                                                                  | <i>Paracoccus aminovorans</i>               | GCA_001546115.1 | 4.58940                | 67.50                | 85.59                            |                                          |
|                                                                                  | <i>Paracoccus halophilus</i>                | GCA_900111785.1 | 4.00871                | 65.20                | 82.17                            |                                          |
|                                                                                  | <i>Paracoccus yeei</i>                      | GCA_002073635.2 | 4.82967                | 67.08                | 81.95                            |                                          |
| Cluster 2/<br><i>Chryseobacterium</i><br>sp. BP8.2<br>GCA_003852805.1            | <i>Chryseobacterium koreense</i>            | GCA_001045435.1 | 3.15420                | 40.10                | 69.38                            | 3000-4810                                |
|                                                                                  | <i>Chryseobacterium camelliae</i>           | GCA_002770595.1 | 4.37635                | 41.80                | 68.86                            |                                          |
|                                                                                  | <i>Chryseobacterium luteum</i>              | GCA_000737785.1 | 4.71855                | 37.30                | 68.70                            |                                          |
|                                                                                  | <i>Chryseobacterium</i> sp. 52              | GCA_002754245.1 | 5.29882                | 37.00                | 68.49                            |                                          |
|                                                                                  | <i>Chryseobacterium antarcticum</i>         | GCA_000729985.1 | 3.12366                | 36.10                | 68.10                            |                                          |
| Cluster 3/<br><i>Parapedobacter</i><br>sp. BP8.3<br>GCA_003852785.1              | <i>Parapedobacter indicus</i>               | GCA_900113765.1 | 6.15523                | 48.00                | 80.23                            | 3796-4949                                |
|                                                                                  | <i>Parapedobacter koreensis</i>             | GCA_900109365.1 | 5.54776                | 48.20                | 74.24                            |                                          |
|                                                                                  | <i>Parapedobacter luteus</i>                | GCA_900168055.1 | 4.82992                | 49.30                | 73.66                            |                                          |
|                                                                                  | <i>Parapedobacter composti</i>              | GCA_900112315.1 | 4.62202                | 50.00                | 73.32                            |                                          |
|                                                                                  | <i>Micrococcales bacterium</i> 72-143       | GCA_001898835.1 | 3.33048                | 71.60                | 85.07                            |                                          |
| Cluster 4/<br>Microbacteriaceae<br>bacterium BP8.4<br>GCA_003852775.1            | <sup>b</sup> <i>Leifsonia</i> sp. Leaf336   | GCA_001423695.1 | 4.15779                | 69.60                | 74.40                            | 2535-3047                                |
|                                                                                  | <sup>b</sup> <i>Microcella alkaliphila</i>  | GCA_002355395.1 | 2.70284                | 68.40                | 74.10                            |                                          |
|                                                                                  | <sup>b</sup> <i>Plantibacter</i> sp. H53    | GCA_001650455.1 | 4.01278                | 69.40                | 73.98                            |                                          |
|                                                                                  | <sup>b</sup> <i>Herbiconiux</i> sp. YR403   | GCA_000799285.1 | 3.60404                | 62.00                | 71.66                            |                                          |
|                                                                                  | <sup>c</sup> <i>Arthrobacter cupressi</i>   | GCA_900099975.1 | 4.0588                 | 67.00                | 70.82                            |                                          |
| Cluster 5/<br><i>Ochrobactrum</i><br><i>intermedium</i> BP8.5<br>GCA_003852825.1 | <i>Ochrobactrum intermedium</i><br>LMG 3301 | GCA_000182645.1 | 4.72539                | 57.70                | 98.48                            | 3645-4502                                |
|                                                                                  | <i>Ochrobactrum anthropi</i>                | GCA_000017405.1 | 5.20578                | 56.15                | 87.48                            |                                          |
|                                                                                  | <i>Ochrobactrum oryzae</i> OA447            | GCA_002943495.1 | 4.46700                | 56.20                | 87.19                            |                                          |
|                                                                                  | <i>Brucella ceti</i>                        | GCA_000590795.1 | 3.27803                | 57.27                | 82.03                            |                                          |
|                                                                                  | <i>Ochrobactrum</i> sp. P6BS-III            | GCA_002016635.1 | 5.25313                | 56.00                | 81.19                            |                                          |

<sup>a</sup> Phylogenetic relatedness was calculated based on ANI value with OrthoANLu algorithm. ANI values higher than 95% indicate that the compared genomes are the same species [39].

<sup>b</sup> Members of Microbacteriaceae family, order Micrococcales.

<sup>c</sup> Member of Micrococcaceae family, order Micrococcales.

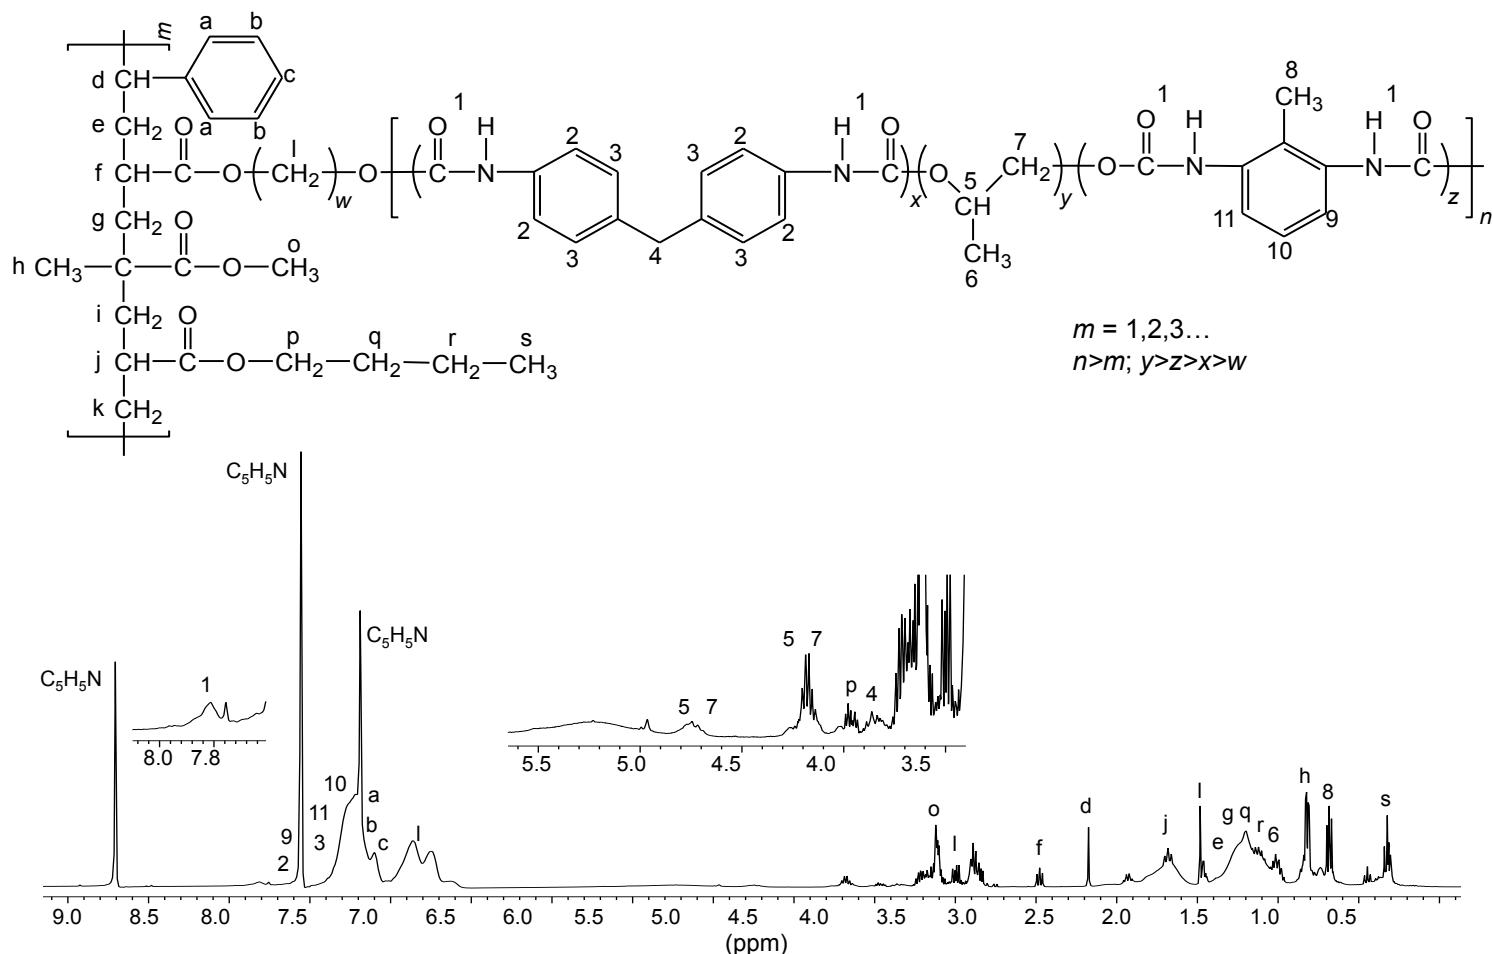

**Figure S1. Proposed chemical structure for the PE-PU-A copolymer present in PolyLack®.**

This structure was proposed based on the  $^1\text{H-NMR}$  analysis of dried PolyLack®, the information included in the manufacturer technical manual [31], the GC-MS analysis (Figure 2), and the most frequent acrylates used in the synthesis of these types of copolymers [45, 46]. Synthesis of PE-PU-A copolymers starts by the polycondensation of polyols (polypropylene glycol) ( $y$  moiety) and diisocyanates (TDI and MDI) ( $x$  and  $z$  moieties) followed by end capping with acrylates' mixture ( $m$  moiety). From the most frequently used acrylates we selected methyl methacrylate, butyl acrylate, hydroxy acrylate and styrene as representatives in this structure. In the  $^1\text{H-NMR}$  spectrum, chemical shifts are provided in parts per million from  $\text{SiMe}_4$  as internal reference. Signal 1 is assigned to carbamate groups ( $\text{NH-COO}$ ); signals a, b, c, 2, 3, 9-11 are assigned to the aromatic protons; signals 4 and 8 correspond to the protons of methylene ( $\text{CH}_2$ ) and methyl ( $\text{CH}_3$ ) groups in MDI and TDI, respectively; signals 5-7 correspond to PPG; signals l correspond to the hydroxyl proton ( $\text{CH}_2\text{-O}$ ) and methylene groups ( $\text{CH}_2$ ) in the chain of hydroxy-acrylate; signals f, j, o and p correspond to the acrylic groups ( $\text{CH-COO}$ ,  $\text{CH}_2\text{-COO}$  or  $\text{CH}_3\text{-COO}$ ), signals d (CH), e, g, i, k, q, r ( $\text{CH}_2$ ), h and s ( $\text{CH}_3$ ) are assigned to methylene and methyl groups in the acrylate mixtures.

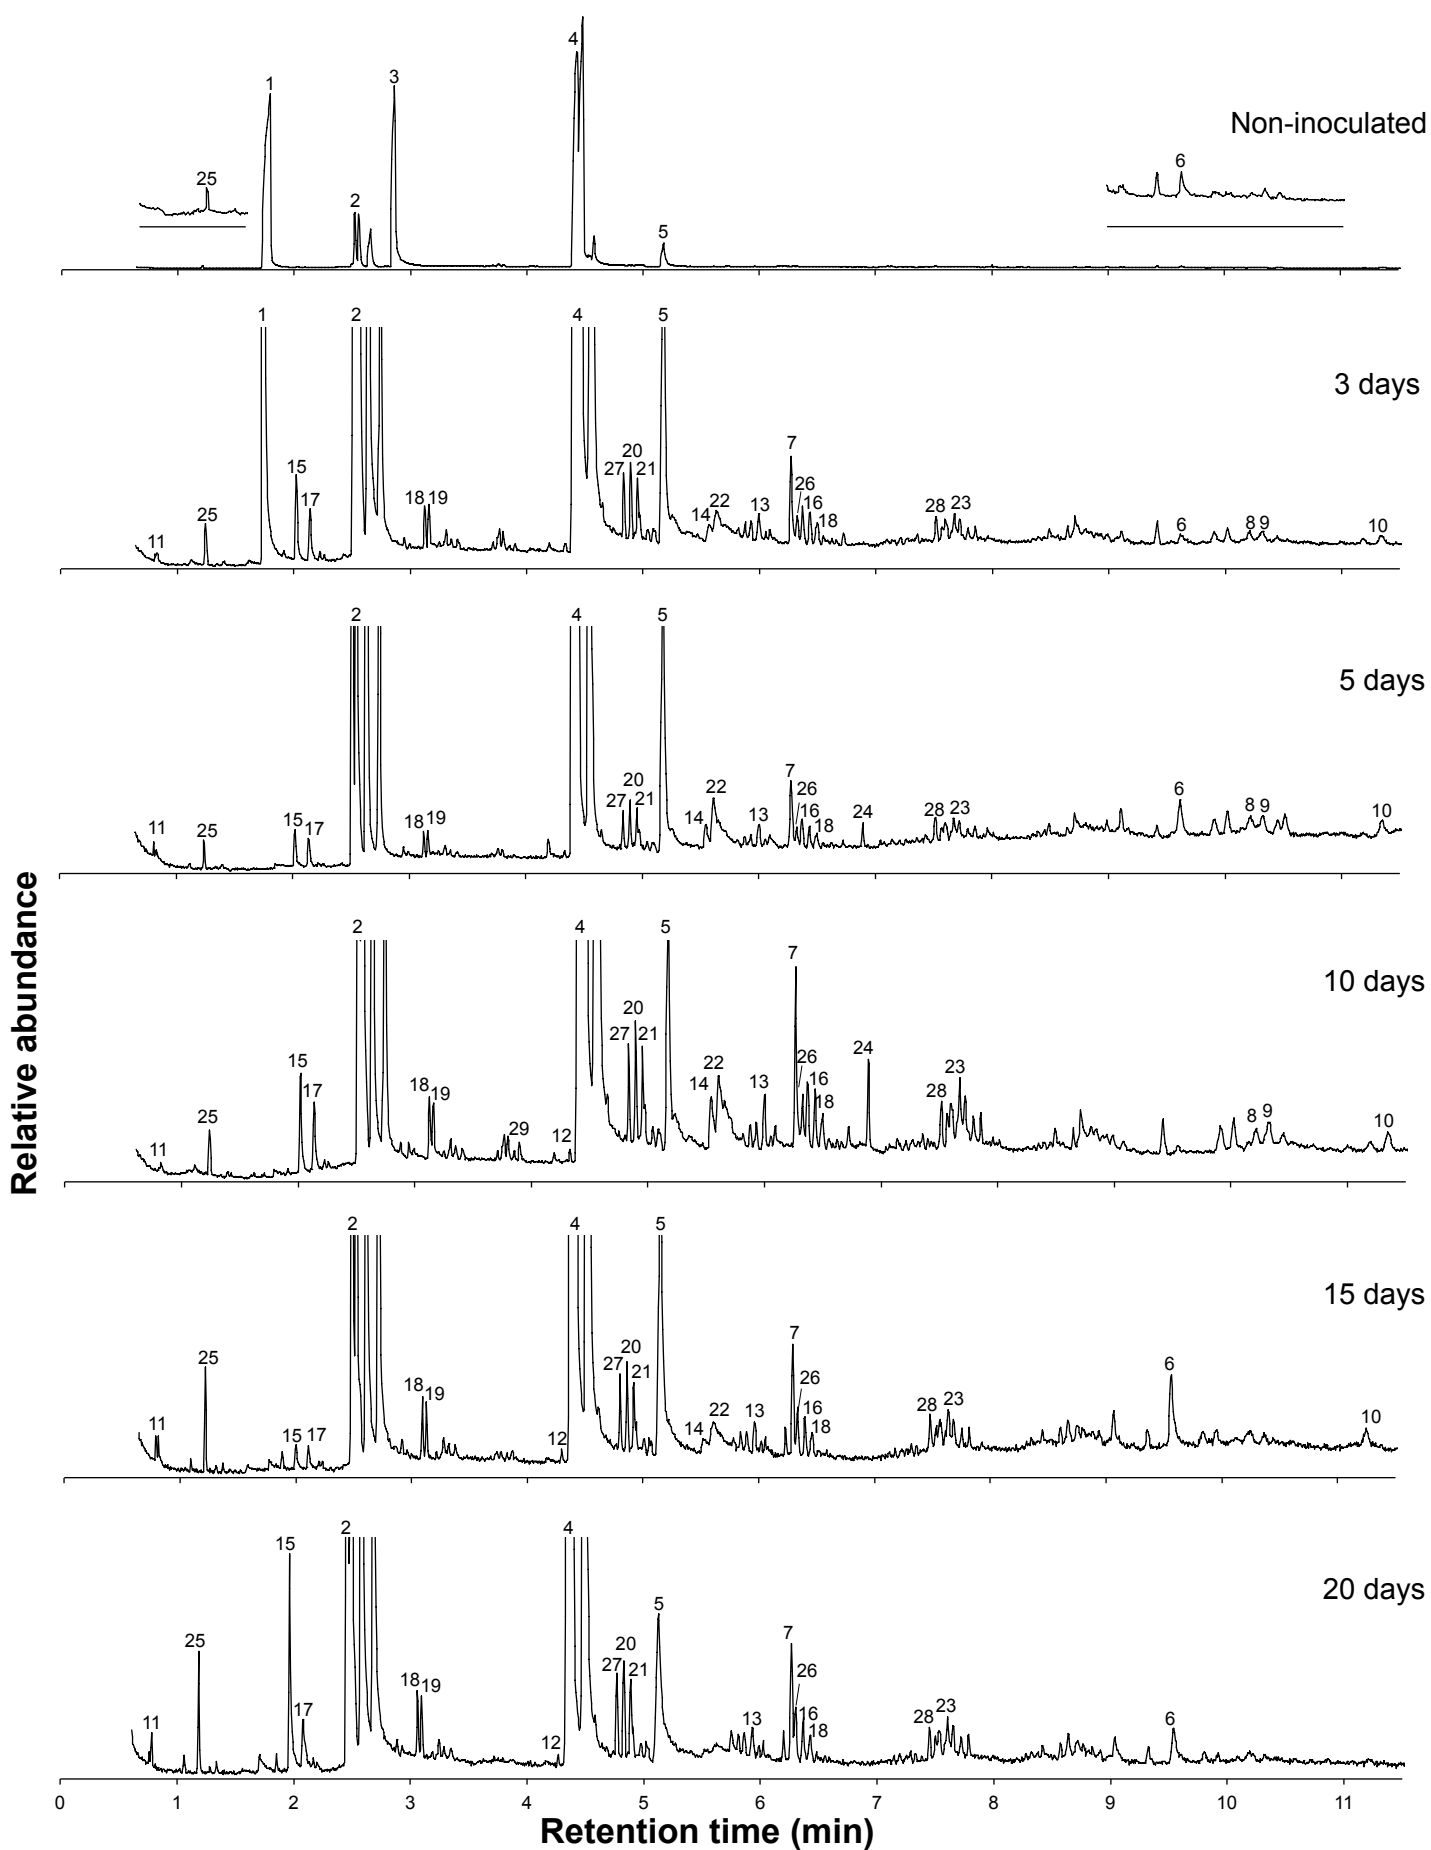

**Figure S2. Chromatograms of cell-free supernatants from BP8 cultures grown in MM-PolyLack.** Numbered signals designate compounds identified by mass spectrometry listed in Figure 2. Chromatogram of non-inoculated sample is at original scale, whereas the other chromatograms are at larger scale.

- A:s Yualikevirus unclassified
- B:s Sphingobacterium unclassified
- C:s Leifsonia unclassified
- D:s Leucobacter unclassified
- E:s Propionibacterium acnes
- F:s Paracoccus unclassified
- G:s Paracoccus denitrificans
- H:s Brevundimonas diminuta
- I:s Ochrobactrum intermedium
- J:s Ochrobactrum unclassified
- K:s Afipia unclassified
- L:s Afipia broomeae
- M:s Rhizobium lupini
- N:s Agrobacterium unclassified
- O:s Alicyclophilus unclassified
- P:s Thiomonas unclassified
- Q:s Achromobacter unclassified
- R:s Achromobacter piechaudii
- S:s Pusillimonas unclassified
- T:s Bordetella unclassified
- U:s Ralstonia unclassified

- F ALCALIGENACEAE
- F BRADYRHIZOBIACEAE
- F BRUCELLACEAE
- F BURKHOLDERIACEAE
- F BURKHOLDERIALES NONAME
- F CAULOBACTERACEAE
- F COMAMONADACEAE
- F MICROBACTERIACEAE
- F PROPIONIBACTERIACEAE
- F RHIZOBIACEAE
- F RHODOBACTERACEAE
- F SIPHOVIRIDAE
- F SPHINGOBACTERIACEAE

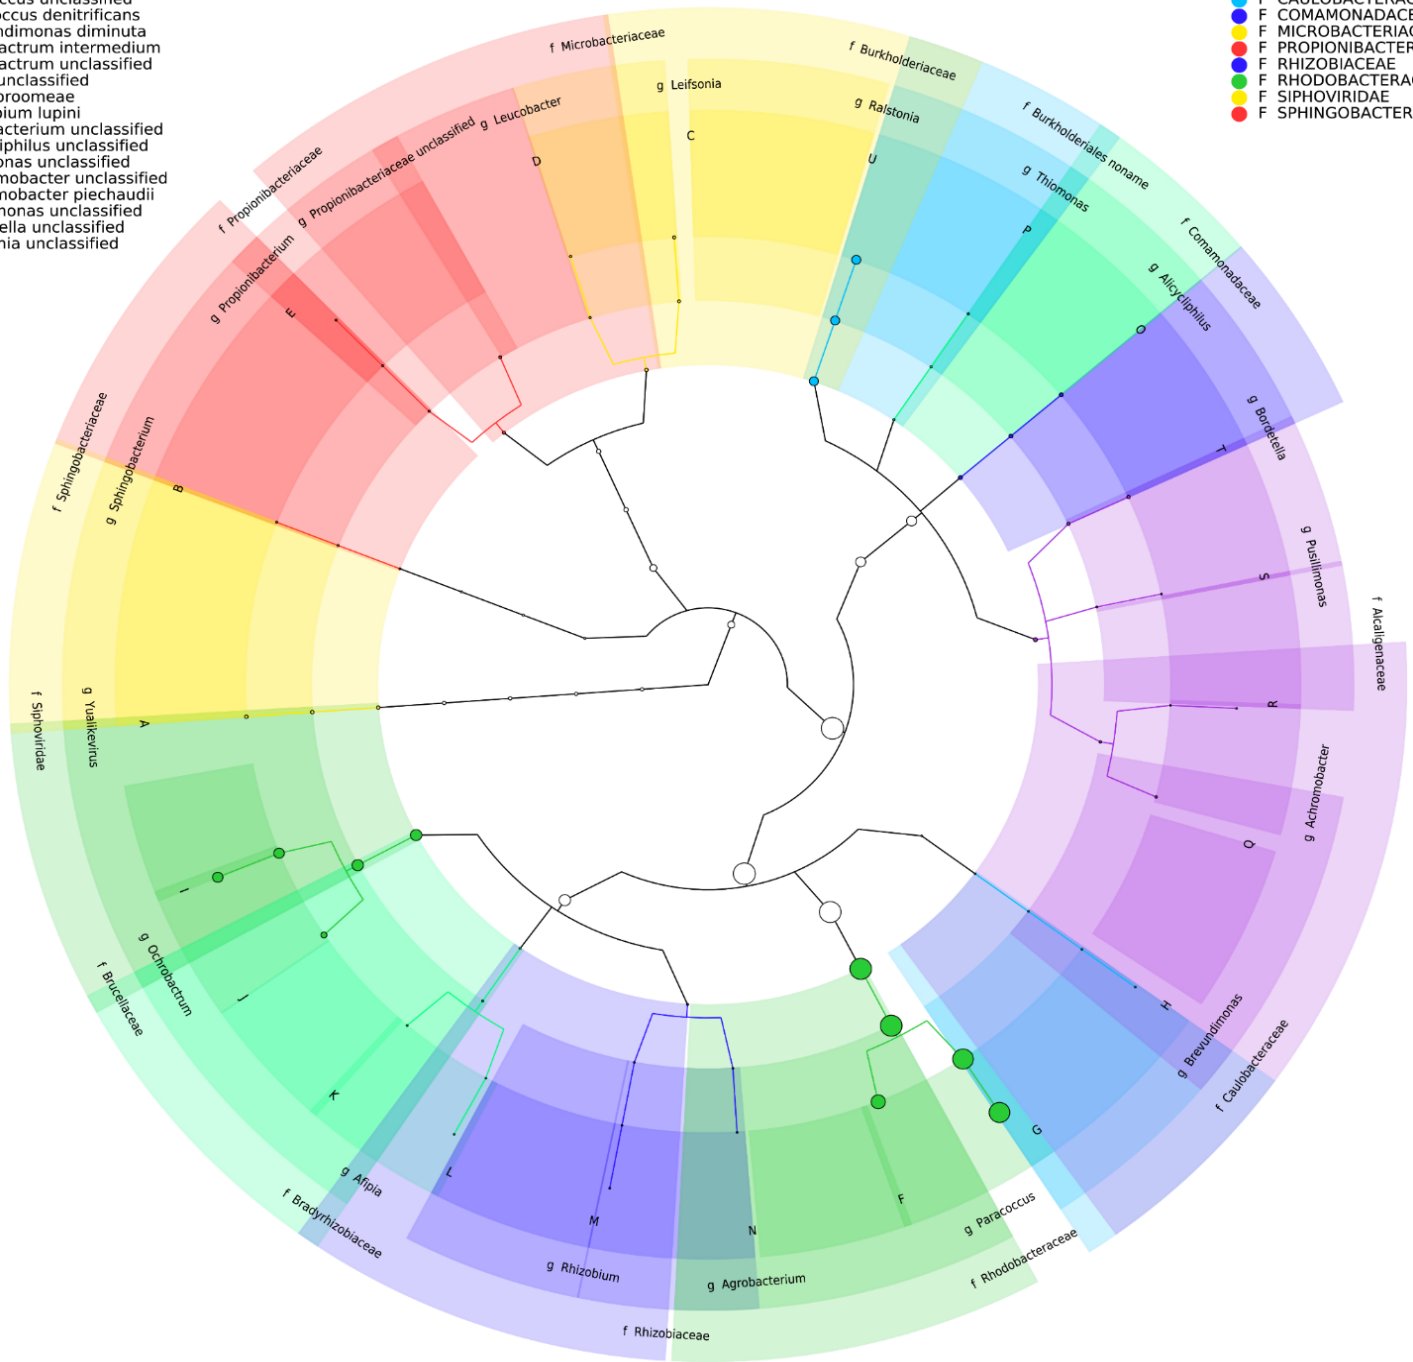

**Figure S3. Taxonomic cladogram of BP8 community microbial diversity profiled with MetaPhlAn.** Circles size is proportional to the taxon relative abundance. The most abundant taxa were *Paracoccus* genus (83.3%) and *Ochrobactrum* genus (8.7%). Families are color-labeled and predicted species diversity is indicated by capital letters [Asnicar F, Weingart G, Tickle TL, Huttenhower C, Segata N. Compact graphical representation of phylogenetic data and metadata with GraPhlAn. PeerJ. 2015;3:e1029].



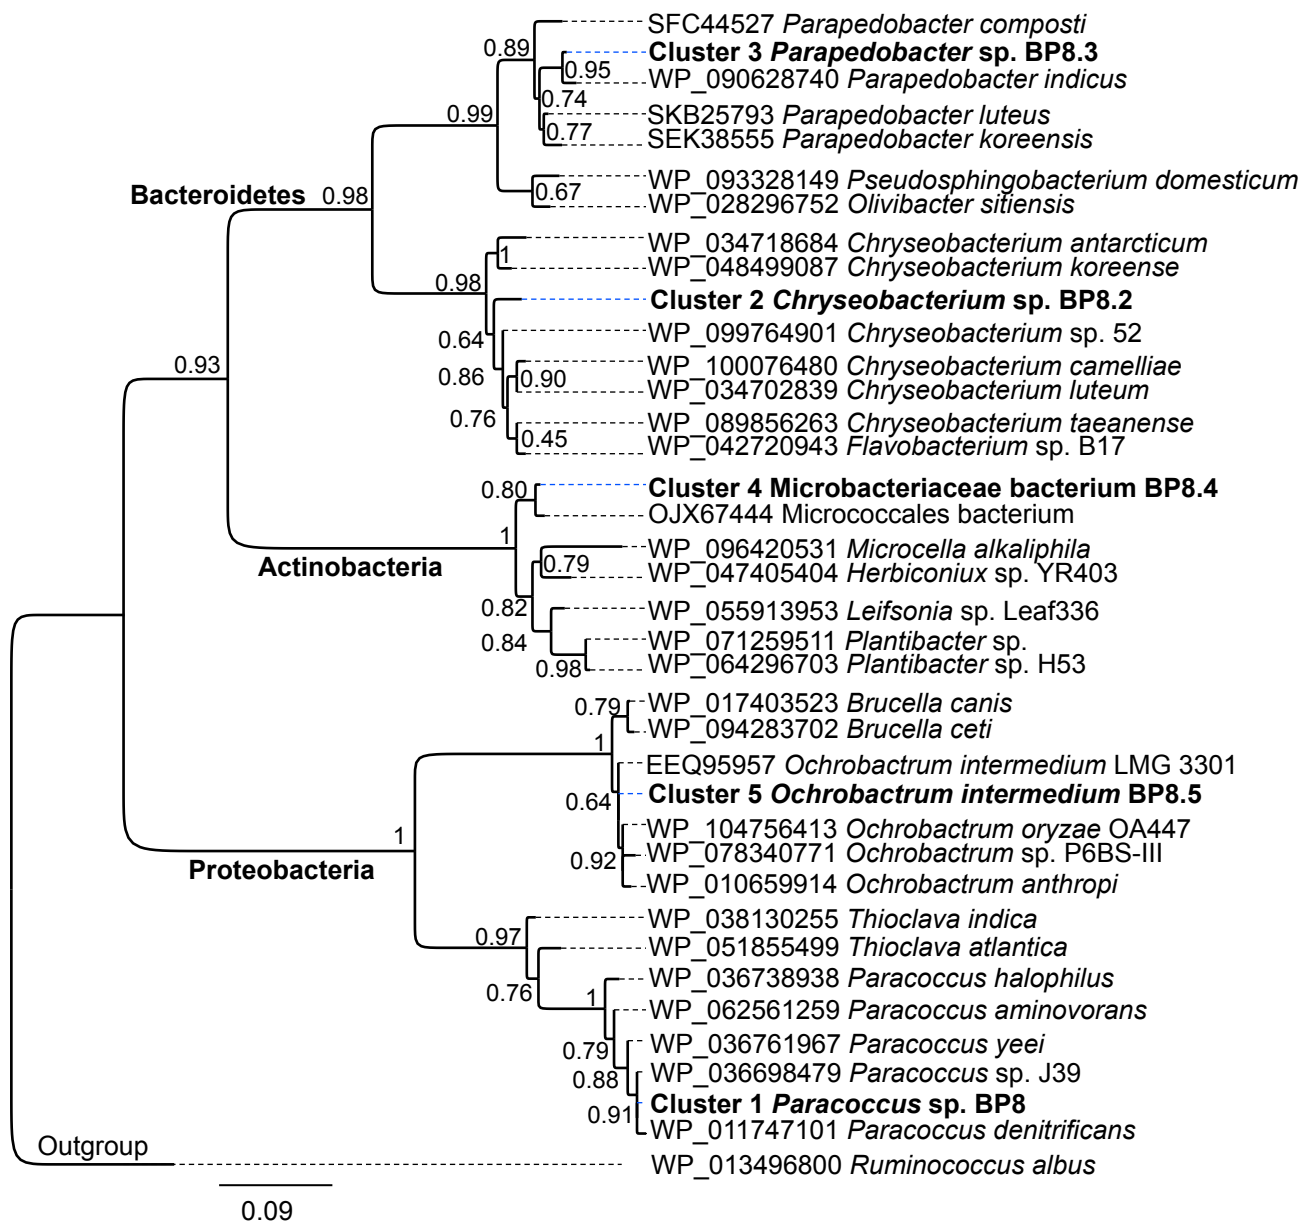

**Figure S4. Maximum likelihood phylogeny for taxonomic delimitation of the deconvoluted genomes from the BP8 metagenome.** This analysis was performed with three phylogenetic markers, ribosomal protein L3, ribosomal protein L5 and DNA gyrase A subunit, which generated similar results. Here we present the analysis for ribosomal protein L3. Branch support values are indicated in the corresponding nodes. Bar indicates the number of expected substitutions per site under the WAG + G model. A sequence of *Ruminococcus albus* (Firmicutes) was used as outgroup. Key genome clusters are highlighted in bold and different Phyla are indicated at the left. Sequences for L3 ribosomal proteins of the deconvoluted genomes are accessible in the NCBI GenBank under accession numbers RQP07704.1, RQP15098.1, RQP16503.1, RQP08603.1 and RQP16393.1 for clusters 1 to 5, respectively.
